# Supplementary material for: Measurement of the axial vector form factor from antineutrino–proton scattering
Source: PubMed Central journal article supplement (PMC9892001; doi:10.1038/s41586-022-05478-3), 2023-02-01
Supplement: 41586_2022_5478_MOESM1_ESM.pdf [file 41586_2022_5478_MOESM1_ESM.pdf]

---

**Supplementary information**

---

**Measurement of the axial vector form factor  
from antineutrino–proton scattering**

---

In the format provided by the  
authors and unedited

**Supplementary Material.**

**Supplementary Table 1 Measured events and predicted backgrounds.** Measured events, post-fit Monte Carlo background prediction, measured signal, and the statistical uncertainties after background subtraction, in each  $Q^2$  bin. Only bins 3-17 are statistically significant and reported in the cross-section.

| Bin | $Q_{\text{low}}^2$ | $Q_{\text{up}}^2$ | Measured Event | Pred. BG | Signal | Stat. Err |
|-----|--------------------|-------------------|----------------|----------|--------|-----------|
| 1   | 0                  | 0.00625           | 0              | 0        | 0      | -         |
| 2   | 0.00625            | 0.0125            | 1              | 0        | 1      | 1         |
| 3   | 0.0125             | 0.025             | 11             | 3.3      | 7.7    | 3.6       |
| 4   | 0.025              | 0.0375            | 18             | 8.3      | 9.7    | 4.6       |
| 5   | 0.0375             | 0.05              | 31             | 22.2     | 8.8    | 7.0       |
| 6   | 0.05               | 0.1               | 328            | 182      | 146    | 23        |
| 7   | 0.1                | 0.15              | 684            | 372.0    | 312    | 32.9      |
| 8   | 0.15               | 0.2               | 1011           | 523.7    | 487.3  | 39.1      |
| 9   | 0.2                | 0.3               | 2507           | 1401     | 1106   | 65        |
| 10  | 0.3                | 0.4               | 2485           | 1563     | 922    | 66        |
| 11  | 0.4                | 0.6               | 3908           | 2861     | 1047   | 84        |
| 12  | 0.6                | 0.8               | 2540           | 1919     | 621    | 69        |
| 13  | 0.8                | 1                 | 1604           | 1262     | 342    | 55        |
| 14  | 1                  | 1.2               | 1019           | 788.3    | 230.7  | 42.0      |
| 15  | 1.2                | 2                 | 1494           | 1164     | 330    | 53        |
| 16  | 2                  | 4                 | 395            | 289      | 106    | 25        |
| 17  | 4                  | 6                 | 37             | 20.6     | 16.4   | 6.8       |
| 18  | 6                  | 10                | 8              | 4.4      | 3.6    | 3.1       |

**Supplementary Table 2 Protons on Target (POT) and Number of Hydrogen Atoms in the Fiducial Volume of the Detector.**

|                          |          |
|--------------------------|----------|
| POT                      | 1.12e+21 |
| Number of Hydrogen Atoms | 2.61e+29 |

**Supplementary Table 3 Measured and fitted cross-sections.** Binned cross-section ( $10^{-38}$ ) with the statistical and systematic uncertainties. The predicted cross-section using the z-expansion fit with different combinations of  $(k_{\max}, \lambda)$  are shown after the data column, with the total uncertainty shown in the bracket.

| Bin | $Q_{\text{low}}^2$ | $Q_{\text{up}}^2$ | $d\sigma/dQ^2(10^{-38})$ | stat.   | sys.    | Fit(8, 0.13) | Fit(6, 0)  |
|-----|--------------------|-------------------|--------------------------|---------|---------|--------------|------------|
| 3   | 0.0125             | 0.025             | 3.06                     | 1.82    | 0.47    | 1.90(5)      | 1.90(4)    |
| 4   | 0.025              | 0.0375            | 0.779                    | 0.73    | 0.22    | 1.81(7)      | 1.81(6)    |
| 5   | 0.0375             | 0.05              | 0.596                    | 0.547   | 0.196   | 1.73(9)      | 1.73(7)    |
| 6   | 0.05               | 0.1               | 1.25                     | 0.353   | 0.195   | 1.55(0.11)   | 1.55(9)    |
| 7   | 0.1                | 0.15              | 1.13                     | 0.179   | 0.153   | 1.31(0.12)   | 1.31(0.11) |
| 8   | 0.15               | 0.2               | 0.962                    | 0.114   | 0.124   | 1.13(0.12)   | 1.13(0.10) |
| 9   | 0.2                | 0.3               | 0.979                    | 0.0834  | 0.107   | 0.92(0.10)   | 0.92(9)    |
| 10  | 0.3                | 0.4               | 0.821                    | 0.0765  | 0.0673  | 0.71(8)      | 0.71(8)    |
| 11  | 0.4                | 0.6               | 0.49                     | 0.0525  | 0.0579  | 0.50(5)      | 0.50(5)    |
| 12  | 0.6                | 0.8               | 0.296                    | 0.0455  | 0.0418  | 0.317(35)    | 0.32(4)    |
| 13  | 0.8                | 1.0               | 0.206                    | 0.0387  | 0.0343  | 0.208(25)    | 0.209(25)  |
| 14  | 1.0                | 1.2               | 0.138                    | 0.0297  | 0.0243  | 0.140(19)    | 0.141(19)  |
| 15  | 1.2                | 2.0               | 0.0561                   | 0.0133  | 0.00835 | 0.063(12)    | 0.063(11)  |
| 16  | 2.0                | 4.0               | 0.0112                   | 0.00525 | 0.00213 | 0.0096(32)   | 0.010(4)   |
| 17  | 4.0                | 6.0               | 0.00587                  | 0.004   | 0.002   | 0.00057(34)  | 0.0006(5)  |

**Supplementary Table 4 Z expansion fit parameters and results.** The  $a_k$  parameters given without uncertainties are not free variables in the fit but set by the sum rule in Eq. 13.

| $k_{\max}$ | $\lambda$ | $r_A$    | $a_0, \dots, a_{k_{\max}}$                                                     |
|------------|-----------|----------|--------------------------------------------------------------------------------|
| 8          | 0.13      | 0.73(17) | $-0.50, 1.50(0.31), -1.2(0.7), -0.1(1.9), 0.2(3.5), 0.46, -0.40, 0.15, -0.044$ |
| 6          | 0         | 0.72(20) | $-0.50, 1.50(0.33), -1.2(0.5), -0.13, 0.15, 0.42, -0.23$                       |

**Supplementary Table 5 Fit correlation matrices.** The z-expansion fit correlation matrices for the free  $a_k$  in the fit, i.e.,  $a_1 \dots a_4$  for  $k_{\max} = 8$  and  $a_1, a_2$  for  $k_{\max} = 6$ .

| $k_{\max}$ | $\lambda$ | Correlation Matrix                                                                                                                                 |
|------------|-----------|----------------------------------------------------------------------------------------------------------------------------------------------------|
| 8          | 0.13      | $\begin{pmatrix} 1. & 0.012 & -0.93 & 0.52 \\ 0.012 & 1. & -0.32 & -0.78 \\ -0.93 & -0.32 & 1. & -0.27 \\ 0.52 & -0.78 & -0.27 & 1. \end{pmatrix}$ |
| 6          | 0         | $\begin{pmatrix} 1. & -0.73 \\ -0.73 & 1. \end{pmatrix}$                                                                                           |

Supplementary Table 6 Total covariance matrix of the measured cross-section

| Bin( $\times 10^{-80}$ ) | 3      | 4     | 5      | 6      | 7      | 8      | 9     | 10    | 11     | 12     | 13      | 14     | 15     | 16       | 17       |
|--------------------------|--------|-------|--------|--------|--------|--------|-------|-------|--------|--------|---------|--------|--------|----------|----------|
| 3                        | 35400. | 1220. | -1500. | -242.  | 311.   | 311.   | 128.  | 65.8  | 125.   | 52.9   | 49.1    | 47.4   | 0.899  | -1.21    | -3.52    |
| 4                        | 1220.  | 5800. | 2480.  | 27.4   | -38.6  | 92.2   | 72.5  | 27.4  | 6.01   | 1.54   | 1.01    | 6.85   | 2.64   | 1.62     | 0.376    |
| 5                        | -1500. | 2480. | 3370.  | 784.   | -11.7  | 63.2   | 76.5  | 46.8  | 37.5   | 29.    | 12.8    | 4.43   | 1.46   | -0.217   | 0.237    |
| 6                        | -242.  | 27.4  | 784.   | 1630.  | 248.   | 84.1   | 117.  | 61.9  | 62.    | 45.5   | 20.6    | 5.59   | -1.24  | 0.0773   | -0.575   |
| 7                        | 311.   | -38.6 | -11.7  | 248.   | 554.   | 222.   | 102.  | 53.4  | 53.6   | 37.2   | 17.     | 5.05   | -1.87  | 0.111    | -0.656   |
| 8                        | 311.   | 92.2  | 63.2   | 84.1   | 222.   | 284.   | 128.  | 34.5  | 40.3   | 28.9   | 15.1    | 7.67   | -1.04  | 0.211    | -0.443   |
| 9                        | 128.   | 72.5  | 76.5   | 117.   | 102.   | 128.   | 184.  | 59.   | 22.9   | 23.8   | 14.4    | 6.98   | -0.02  | 0.382    | 0.135    |
| 10                       | 65.8   | 27.4  | 46.8   | 61.9   | 53.4   | 34.5   | 59.   | 104.  | 27.4   | 12.4   | 10.6    | 7.12   | 1.92   | 0.278    | 0.495    |
| 11                       | 125.   | 6.01  | 37.5   | 62.    | 53.6   | 40.3   | 22.9  | 27.4  | 61.    | 22.8   | 10.3    | 6.2    | 1.63   | 0.0879   | 0.0404   |
| 12                       | 52.9   | 1.54  | 29.    | 45.5   | 37.2   | 28.9   | 23.8  | 12.4  | 22.8   | 38.2   | 15.8    | 4.67   | 0.966  | 0.102    | 0.0698   |
| 13                       | 49.1   | 1.01  | 12.8   | 20.6   | 17.    | 15.1   | 14.4  | 10.6  | 10.3   | 15.8   | 26.7    | 12.5   | 0.927  | -0.0491  | 0.0693   |
| 14                       | 47.4   | 6.85  | 4.43   | 5.59   | 5.05   | 7.67   | 6.98  | 7.12  | 6.2    | 4.67   | 12.5    | 14.7   | 2.2    | -0.247   | 0.0263   |
| 15                       | 0.899  | 2.64  | 1.46   | -1.24  | -1.87  | -1.04  | -0.02 | 1.92  | 1.63   | 0.966  | 0.927   | 2.2    | 2.46   | 0.0602   | 0.0196   |
| 16                       | -1.21  | 1.62  | -0.217 | 0.0773 | 0.111  | 0.211  | 0.382 | 0.278 | 0.0879 | 0.102  | -0.0491 | -0.247 | 0.0602 | 0.32     | -0.00339 |
| 17                       | -3.52  | 0.376 | 0.237  | -0.575 | -0.656 | -0.443 | 0.135 | 0.495 | 0.0404 | 0.0698 | 0.0693  | 0.0263 | 0.0196 | -0.00339 | 0.194    |

**Supplementary Table 7 Statistical only covariance matrix of the measured cross-section**

|    |            |            |            |          |           |            |           |         |            |           |            |            |            |            |            |            |            |            |           |
|----|------------|------------|------------|----------|-----------|------------|-----------|---------|------------|-----------|------------|------------|------------|------------|------------|------------|------------|------------|-----------|
| 3  | 28900.     |            |            |          |           |            |           |         |            |           |            |            |            |            |            |            |            |            |           |
| 4  | 966.       | 466.       |            |          |           |            |           |         |            |           |            |            |            |            |            |            |            |            |           |
| 5  | -1410.     | 2160.      | -1110.     |          |           |            |           |         |            |           |            |            |            |            |            |            |            |            |           |
| 6  | -466.      | 11.5       | 466.       | 466.     |           |            |           |         |            |           |            |            |            |            |            |            |            |            |           |
| 7  | 50.9       | -86.2      | 11.5       | -86.2    | 50.9      |            |           |         |            |           |            |            |            |            |            |            |            |            |           |
| 8  | 19.1       | 3.8        | 19.3       | -71.7    | 41.1      | 6.83       |           |         |            |           |            |            |            |            |            |            |            |            |           |
| 9  | -2.11      | 4.95       | 6.47       | -1.84    | -2.29     | 1.54       | 50.9      |         |            |           |            |            |            |            |            |            |            |            |           |
| 10 | 0.011      | -0.254     | 0.585      | 5.31     | -15.2     | 1.54       | 50.9      | 0.011   |            |           |            |            |            |            |            |            |            |            |           |
| 11 | -0.0296    | -0.0498    | -0.00713   | 0.17     | 1.98      | -0.111     | 1.01      | 0.011   | -0.0296    |           |            |            |            |            |            |            |            |            |           |
| 12 | -0.0451    | -0.00699   | -0.0124    | -0.129   | 0.3       | 0.848      | -0.117    | 0.011   | -0.0498    | -0.00699  |            |            |            |            |            |            |            |            |           |
| 13 | -0.022     | -0.0117    | -0.00844   | 0.0122   | -0.102    | 0.189      | -5.12     | 0.68    | -0.0117    | 0.0122    | -0.00844   |            |            |            |            |            |            |            |           |
| 14 | -0.00704   | -0.00328   | -0.0052    | -0.00934 | -0.045    | 0.0613     | 0.193     | 0.238   | -0.00328   | -0.0052   | -0.00934   | -0.00704   |            |            |            |            |            |            |           |
| 15 | 0.00136    | 0.00173    | -0.00102   | 0.00539  | -0.0111   | 0.0219     | 0.113     | 0.0393  | 0.00173    | -0.00102  | 0.00539    | 0.00136    | -0.00136   |            |            |            |            |            |           |
| 16 | -0.0000117 | 0.0000244  | 0.00017    | 0.000653 | -0.00287  | -0.00173   | -0.000453 | 0.006   | -0.000117  | 0.000244  | -0.00173   | -0.0000117 | 0.0000244  | -0.0000117 |            |            |            |            |           |
| 17 | -0.0000439 | -0.0000352 | 0.00000806 | 0.00021  | -0.000183 | -0.0000753 | -0.000791 | -0.0009 | -0.0000439 | -0.000352 | 0.00000806 | -0.0000439 | -0.0000352 | 0.00000806 | -0.0000439 | -0.0000352 | 0.00000806 | -0.0000753 | -0.000791 |
